# Supplementary material for: Parents' self-reported experiences and information needs related to acute pediatric asthma exacerbations: A mixed studies systematic review
Source: PubMed Central journal article supplement — PEC Innov. 2021 Nov 6;1:100006. doi: 10.1016/j.pecinn.2021.100006 (PMC10194336; doi:10.1016/j.pecinn.2021.100006), 2021-11-06
Supplement: mmc2.pdf [file mmc2.pdf]

1 **Supplementary Material 2 – Search strategies**

2 Database: Ovid MEDLINE(R) Epub Ahead of Print, In-Process & Other Non-Indexed Citations,

3 Ovid MEDLINE(R) Daily and Ovid MEDLINE(R) 1946 to December 20, 2019

4 Search Title: Asthma-Parental-Info\_TREKK\_1

5 Search Strategy:

| #  | Searches                                             | Results |
|----|------------------------------------------------------|---------|
| 1  | exp asthma/pc, th, dt                                | 55251   |
| 2  | (asthma* and exacerbat*).ti,ab.                      | 12514   |
| 3  | ((acute or attack*) adj2 asthma*).ti,ab.             | 7694    |
| 4  | (asthma* adj1 manag*).ti,ab.                         | 3766    |
| 5  | or/1-4 [MeSH & keywords for acute asthma management] | 66655   |
| 6  | Adolescent/                                          | 1978715 |
| 7  | Child/                                               | 1650591 |
| 8  | Infant/                                              | 775609  |
| 9  | Minor/                                               | 2549    |
| 10 | Pediatrics/                                          | 52436   |
| 11 | p?ediatric.ti,ab.                                    | 299699  |

|    |                                           |         |
|----|-------------------------------------------|---------|
| 12 | newborn*.ti,ab.                           | 157678  |
| 13 | (baby* or babies*).ti,ab.                 | 70520   |
| 14 | infant*.ti,ab.                            | 392112  |
| 15 | toddler*.ti,ab.                           | 10439   |
| 16 | (pre?schooler* or pre schooler*).ti,ab.   | 6851    |
| 17 | (school?child* or school child*).ti,ab.   | 34969   |
| 18 | (school?age* or school age*).ti,ab.       | 21539   |
| 19 | nursery school*.ti,ab.                    | 1073    |
| 20 | kindergar*.ti,ab.                         | 6530    |
| 21 | (primary school* or grade school*).ti,ab. | 12665   |
| 22 | secondary school*.ti,ab.                  | 10022   |
| 23 | elementary school*.ti,ab.                 | 9545    |
| 24 | (high school* or highschool*).ti,ab.      | 30982   |
| 25 | child*.ti,ab.                             | 1338445 |
| 26 | (kid or kids).ti,ab.                      | 7491    |
| 27 | prepubescen*.ti,ab.                       | 974     |
| 28 | pubescen*.ti,ab.                          | 2257    |

|    |                          |         |
|----|--------------------------|---------|
| 29 | pubert*.ti,ab.           | 36749   |
| 30 | adolescen*.ti,ab.        | 265441  |
| 31 | teenage*.ti,ab.          | 20592   |
| 32 | boy*.ti,ab.              | 149619  |
| 33 | girl*.ti,ab.             | 144244  |
| 34 | (minor or minors).ti,ab. | 220153  |
| 35 | or/6-34 [CHILD FILTER]   | 4071610 |
| 36 | caregivers/              | 34611   |
| 37 | family/                  | 74256   |
| 38 | mothers/                 | 41714   |
| 39 | mother-child relations/  | 19929   |
| 40 | fathers/                 | 8728    |
| 41 | father-child relations/  | 3548    |
| 42 | exp parents/             | 108292  |
| 43 | parent-child relations/  | 33019   |
| 44 | parenting/               | 15964   |
| 45 | legal guardians/         | 2032    |

|    |                                                                |         |
|----|----------------------------------------------------------------|---------|
| 46 | (care giver* or caregiver* or carer* or guardian*).tw,kf.      | 82260   |
| 47 | (families* or family* or father* or mother* or parent*).tw,kf. | 1420198 |
| 48 | or/36-47 [CAREGIVER FILTER]                                    | 1526678 |
| 49 | Attitude to Health/                                            | 82476   |
| 50 | Caregivers/ed, px                                              | 22618   |
| 51 | exp Consumer Health Information/                               | 8592    |
| 52 | Decision Making/                                               | 92026   |
| 53 | Evidence-based practice/                                       | 9540    |
| 54 | Focus Groups/                                                  | 28283   |
| 55 | Health Education/                                              | 59700   |
| 56 | Health Knowledge, Attitudes, Practice/                         | 107118  |
| 57 | exp Information Literacy/                                      | 5374    |
| 58 | Information Seeking Behavior/                                  | 2200    |
| 59 | Information Services/                                          | 15438   |
| 60 | Parents/ed, px                                                 | 32484   |
| 61 | exp "Patient Acceptance of Health Care"/                       | 146261  |
| 62 | Patient Compliance/                                            | 56630   |

|    |                                            |        |
|----|--------------------------------------------|--------|
| 63 | "Patient Education as Topic"/              | 83635  |
| 64 | Patient Participation/                     | 24902  |
| 65 | Patient Satisfaction/                      | 79427  |
| 66 | Personal Satisfaction/                     | 17904  |
| 67 | "Quality of Life"/                         | 185700 |
| 68 | "Retention (Psychology)"/                  | 8476   |
| 69 | "Surveys and Questionnaires"/              | 445166 |
| 70 | Life Change events/                        | 22419  |
| 71 | (adhere* or nonadhere*).tw,kf.             | 180359 |
| 72 | attitude*.tw,kf.                           | 145676 |
| 73 | belie*.tw,kf.                              | 284901 |
| 74 | (complan* or comply or noncomplan*).tw,kf. | 138970 |
| 75 | focus group*.tw,kf.                        | 43792  |
| 76 | health litera*.tw,kf.                      | 11456  |
| 77 | inform*.ab. /freq=3                        | 114943 |
| 78 | interview*.tw,kf.                          | 342638 |
| 79 | know*.ab. /freq=3                          | 78579  |

|    |                                                                                                                                                                                                                       |          |
|----|-----------------------------------------------------------------------------------------------------------------------------------------------------------------------------------------------------------------------|----------|
| 80 | misconce*.tw,kf.                                                                                                                                                                                                      | 9313     |
| 81 | opinion*.tw,kf.                                                                                                                                                                                                       | 98405    |
| 82 | participat*.tw,kf.                                                                                                                                                                                                    | 513854   |
| 83 | perspective*.tw,kf.                                                                                                                                                                                                   | 301439   |
| 84 | prefer*.tw,kf.                                                                                                                                                                                                        | 440314   |
| 85 | QoL.tw,kf.                                                                                                                                                                                                            | 36407    |
| 86 | quality of life.tw,kf.                                                                                                                                                                                                | 266491   |
| 87 | questionnaire*.tw,kf.                                                                                                                                                                                                 | 488931   |
| 88 | satisf*.tw,kf.                                                                                                                                                                                                        | 319978   |
| 89 | or/49-88 [PATIENT PREFERENCES]                                                                                                                                                                                        | 3377381  |
| 90 | North America/                                                                                                                                                                                                        | 19774    |
| 91 | exp United States/                                                                                                                                                                                                    | 1322416  |
| 92 | exp Canada/                                                                                                                                                                                                           | 154230   |
| 93 | (canada or united states).cp.                                                                                                                                                                                         | 12821957 |
| 94 | (Alberta* or British Columbia* or Colombie Britannique* or Ile du Prince<br>Edouard* or Labrador* or Manitoba* or New Brunswick* or Newfoundland*<br>or Northwest Territories* or Nouveau Brunswick*).tw,kf,ia,in,pl. | 228639   |

|     |                                                                                                                                                                                                                                                                                                                                                                                                                                                                                                                                                                                                                                                                                                                  |          |
|-----|------------------------------------------------------------------------------------------------------------------------------------------------------------------------------------------------------------------------------------------------------------------------------------------------------------------------------------------------------------------------------------------------------------------------------------------------------------------------------------------------------------------------------------------------------------------------------------------------------------------------------------------------------------------------------------------------------------------|----------|
| 95  | (Calgar* or Edmonton* or Montreal* or Ottawa* or Toronto* or Vancouver* or Winnipeg*).tw,kf,ia,in,pl.                                                                                                                                                                                                                                                                                                                                                                                                                                                                                                                                                                                                            | 540765   |
| 96  | (canad* or united states or USA).tw,kf,ia,in,pl.                                                                                                                                                                                                                                                                                                                                                                                                                                                                                                                                                                                                                                                                 | 5445411  |
| 97  | (First Nation* or Metis).tw,kf,ia,in,pl.                                                                                                                                                                                                                                                                                                                                                                                                                                                                                                                                                                                                                                                                         | 4861     |
| 98  | (North America* or Northamerica*).ti.                                                                                                                                                                                                                                                                                                                                                                                                                                                                                                                                                                                                                                                                            | 10310    |
| 99  | (Nouvelle Ecosse or Nova Scotia* or Nun?v?t or NWT* or Ontario* or Prince Edward Island* or PEI* or Quebec* or Saskatchewan* or Terre Neuve* or Territoires du Nord Ouest or Yukon*).tw,kf,ia,in,pl.                                                                                                                                                                                                                                                                                                                                                                                                                                                                                                             | 461189   |
| 100 | (Alabama* or Alaska* or Arizona* or Arkansas* or California* or Colorad* or Connecticut* or Delawar* or Florid* or Georgia* or Hawaii* or Idaho* or Illinois* or Indiana* or Iowa* or Kansas* or Kentuck* or Louisian* or Maine* or Maryland* or Massachusetts* or Michigan* or Minnesota* or Mississippi* or Missouri* or Montana* or Nebraska* or Nevada* or New Hampshire* or New Jersey* or New Mexic* or New York* or North Carolin* or North Dakota* or Ohio* or Oklahoma* or Oregon* or Pennsylvania* or Rhode Island* or South Carolin* or South Dakota* or Tennessee* or Texas* or Texan* or Utah* or Vermont* or Virginia* or Washington* or West Virginia* or Wisconsin* or Wyoming*).tw,kf,ia,in,pl. | 4761506  |
| 101 | or/90-100 [US & Canada filter]                                                                                                                                                                                                                                                                                                                                                                                                                                                                                                                                                                                                                                                                                   | 15274282 |
| 102 | 5 and 35 and 48 and 89 and 101                                                                                                                                                                                                                                                                                                                                                                                                                                                                                                                                                                                                                                                                                   | 1628     |

|     |                                                           |      |
|-----|-----------------------------------------------------------|------|
| 103 | limit 102 to (yr="2002 -Current" and (english or french)) | 1260 |
|-----|-----------------------------------------------------------|------|

6

7 Database: CINAHL Plus with Full Text via EBSCOhost

8 Search Title: Asthma-Parental-Info\_TREKK\_2

9 Search Strategy:

| #   | Query                                                                                                                                                                                                                                                                                                                                                                                                                                                                                                       | Results |
|-----|-------------------------------------------------------------------------------------------------------------------------------------------------------------------------------------------------------------------------------------------------------------------------------------------------------------------------------------------------------------------------------------------------------------------------------------------------------------------------------------------------------------|---------|
|     | S5 AND S35 AND S36 AND S42 AND S53                                                                                                                                                                                                                                                                                                                                                                                                                                                                          |         |
|     | Limiters - Published Date: 20020101-20191231; Language:                                                                                                                                                                                                                                                                                                                                                                                                                                                     |         |
| S54 | English, French                                                                                                                                                                                                                                                                                                                                                                                                                                                                                             | 641     |
|     | S43 OR S44 OR S45 OR S46 OR S47 OR S48 OR S49 OR S50                                                                                                                                                                                                                                                                                                                                                                                                                                                        |         |
| S53 | OR S51 OR S52                                                                                                                                                                                                                                                                                                                                                                                                                                                                                               | 982,594 |
|     | Alabama* or Alaska* or Arizona* or Arkansas* or California*<br>or Colorad* or Connecticut* or Delawar* or Florid* or Georgia*<br>or Hawaii* or Idaho* or Illinois* or Indiana* or Iowa* or<br>Kansas* or Kentuck* or Louisian* or Maine* or Maryland* or<br>Massachusetts* or Michigan* or Minnesota* or Mississippi* or<br>Missouri* or Montana* or Nebraska* or Nevada* or New<br>Hampshire* or New Jersey* or New Mexic* or New York* or<br>S52 North Carolin* or North Dakota* or Ohio* or Oklahoma* or | 396,049 |



Oregon\* or Pennsylvania\* or Rhode Island\* or South Carolin\*  
 or South Dakota\* or Tennessee\* or Texas\* or Texan\* or Utah\*  
 or Vermont\* or Virginia\* or Washington\* or West Virginia\* or  
 Wisconsin\* or Wyoming\*

Nouvelle Ecosse or Nova Scotia\* or Nun#v##t or NWT\* or  
 Ontario\* or Prince Edward Island\* or PEI\* or Quebec\* or  
 Saskatchewan\* or Terre Neuve\* or Territoires du Nord Ouest or

S51 Yukon\* 39,245

S50 TI (North America\* or Northamerica\*) 2,481

S49 First Nation\* or Metis 29,239

Calgar\* or Edmonton\* or Montreal\* or Ottawa\* or Toronto\* or  
 S48 Vancouver\* or Winnipeg\* 16,177

Alberta\* or British Columbia\* or Colombie Britannique\* or Ile  
 du Prince Edouard\* or Labrador\* or Manitoba\* or New  
 Brunswick\* or Newfoundland\* or Northwest Territories\* or  
 S47 Nouveau Brunswick\* 18,644

S46 (canad\* or united states or USA) 570,645

S45 (MH "Canada+") 93,640

|     |                                                                                                                                                                                                                                                                                        |           |
|-----|----------------------------------------------------------------------------------------------------------------------------------------------------------------------------------------------------------------------------------------------------------------------------------------|-----------|
| S44 | (MH "United States+")                                                                                                                                                                                                                                                                  | 641,980   |
| S43 | (MH "North America")                                                                                                                                                                                                                                                                   | 3,285     |
| S42 | S37 OR S38 OR S39 OR S40 OR S41                                                                                                                                                                                                                                                        | 1,776,779 |
| S41 | AB (adhere* or nonadhere* or attitude* or belie* or complian* or comply or noncomplian* or focus group* or health litera* or inform* or interview* or know* or misconce* or opinion* or participat* or perspective* or prefer* or QOL or quality of life or questionnaire* or satisf*) | 1,212,576 |
| S40 | TI (adhere* or nonadhere* or attitude* or belie* or complian* or comply or noncomplian* or focus group* or health litera* or inform* or interview* or know* or misconce* or opinion* or participat* or perspective* or prefer* or QOL or quality of life or questionnaire* or satisf*) | 355,242   |
| S39 | MH questionnaires+ OR MH survey                                                                                                                                                                                                                                                        | 368,134   |
| S38 | MH information seeking behavior OR MH information services OR MH memory OR MH memory, short term OR MH parenting education OR MH parents/ED/PF OR MH patient compliance OR MH patient education OR MH patient satisfaction OR MH                                                       | 354,430   |

|     |                                                                                                                                                                                                                                                                                                                                          |           |
|-----|------------------------------------------------------------------------------------------------------------------------------------------------------------------------------------------------------------------------------------------------------------------------------------------------------------------------------------------|-----------|
|     | personal satisfaction OR MH professional practice, evidence-based+ OR MH quality of life                                                                                                                                                                                                                                                 |           |
|     | MH "attitude to health" OR MH "caregivers/ED/PF" OR MH consumer health information+ OR MH consumer participation OR MH decision making, family OR MH decision making, patient OR MH focus groups OR MH health education OR MH health knowledge OR MH interviews+ OR MH information literacy+ OR MH information needs                     | 352,788   |
| S37 | MH caregivers OR MH family OR MH fathers OR MH mothers OR MH parent-child relations+ OR MH parenting OR MH parents OR TI ( ("care giver*" or caregiver* or care* or guardian*) OR (famil* or father* or mother* or parent*) ) OR AB ( ("care giver*" or caregiver* or care* or guardian*) OR (famil* or father* or mother* or parent*) ) | 1,119,347 |
| S36 | S6 OR S7 OR S8 OR S9 OR S10 OR S11 OR S12 OR S13 OR S14 OR S15 OR S16 OR S17 OR S18 OR S19 OR S20 OR S21 OR S22 OR S23 OR S24 OR S25 OR S26 OR S27 OR S28 OR S29 OR S30 OR S31 OR S32 OR S33 OR S34                                                                                                                                      | 1,074,891 |
| S35 | TI ( (minor or minors) ) OR AB ( (minor or minors) )                                                                                                                                                                                                                                                                                     | 26,900    |
| S34 |                                                                                                                                                                                                                                                                                                                                          |           |

|     |                                                                                             |         |
|-----|---------------------------------------------------------------------------------------------|---------|
| S33 | TI girl* OR AB girl*                                                                        | 36,966  |
| S32 | TI boy* OR AB boy*                                                                          | 35,439  |
| S31 | TI teenage* OR AB teenage*                                                                  | 9,220   |
| S30 | TI adolescen* OR AB adolescen*                                                              | 119,808 |
| S29 | TI pubert* OR AB pubert*                                                                    | 5,091   |
| S28 | TI pubescent* OR AB pubescent*                                                              | 156     |
| S27 | TI prepubescent* OR AB prepubescent*                                                        | 243     |
| S26 | TI ( (kid or kids) ) OR AB ( (kid or kids) )                                                | 8,513   |
| S25 | TI child* OR AB child*                                                                      | 428,298 |
| S24 | TI ( (high school* or highschool* ) ) OR AB ( (high school* or<br>highschool* ) )           | 28,803  |
| S23 | TI elementary school* OR AB elementary school*                                              | 5,277   |
| S22 | TI secondary school* OR AB secondary school*                                                | 7,562   |
| S21 | TI ( (primary school* or grade school* ) ) OR AB ( (primary<br>school* or grade school* ) ) | 19,821  |

|     |                                                                                    |         |
|-----|------------------------------------------------------------------------------------|---------|
| S20 | TI kindergar* OR AB kindergar*                                                     | 2,571   |
| S19 | TI nursery school* OR AB nursery school*                                           | 331     |
| S18 | TI ( (school#age* or school age*) ) OR AB ( (school#age* or school age*) )         | 36,961  |
| S17 | TI ( (school#child* or school child*) ) OR AB ( (school#child* or school child*) ) | 41,367  |
| S16 | TI ( pre#schooler* or pre schooler* ) OR AB ( pre#schooler* or pre schooler* )     | 3,720   |
| S15 | TI toddler* OR AB toddler*                                                         | 5,730   |
| S14 | TI infant* OR AB infant*                                                           | 92,524  |
| S13 | TI ( baby* or babies* ) OR AB ( baby* or babies* )                                 | 29,170  |
| S12 | TI newborn* OR AB newborn*                                                         | 26,573  |
| S11 | TI p#ediatric OR AB p#ediatric                                                     | 108,443 |
| S10 | (MH "Pediatrics")                                                                  | 17,761  |
| S9  | (MH "Minors (Legal)")                                                              | 643     |

|    |                                                                          |         |
|----|--------------------------------------------------------------------------|---------|
| S8 | (MH "Infant")                                                            | 154,327 |
| S7 | (MH "Child")                                                             | 414,159 |
| S6 | (MH "Adolescence")                                                       | 477,164 |
| S5 | S1 OR S2 OR S3 OR S4                                                     | 18,276  |
| S4 | TI (asthma* N1 manag*) or AB (asthma* N1 manag*)                         | 2,718   |
| S3 | TI ((acute or attack*) N2 asthma*) OR AB ((acute or attack*) N2 asthma*) | 2,036   |
| S2 | TI (asthma* and exacerbat*) or AB (asthma* and exacerbat*)               | 3,105   |
| S1 | (MH "Asthma+/PC/DT/TH")                                                  | 15,404  |

10

11 Database: Ovid PsycINFO 1987 to December Week 3 2019

12 Search Title: Asthma-Parental-Info\_TREKK\_3

13 Search Strategy:

| # | Searches                        | Results |
|---|---------------------------------|---------|
| 1 | exp asthma/                     | 4046    |
| 2 | (asthma* and exacerbat*).ti,ab. | 358     |

|    |                                           |       |
|----|-------------------------------------------|-------|
| 3  | ((acute or attack*) adj2 asthma*).ti,ab.  | 247   |
| 4  | (asthma* adj1 manag*).ti,ab.              | 463   |
| 5  | or/1-4 [MeSH & KEYWORDS FOR ASTHMA]       | 4185  |
| 6  | Pediatrics/                               | 23697 |
| 7  | p?ediatric.ti,ab.                         | 28457 |
| 8  | newborn*.ti,ab.                           | 8841  |
| 9  | (baby* or babies*).ti,ab.                 | 14450 |
| 10 | infant*.ti,ab.                            | 62138 |
| 11 | toddler*.ti,ab.                           | 8497  |
| 12 | (pre?schooler* or pre schooler*).ti,ab.   | 10619 |
| 13 | (school?child* or school child*).ti,ab.   | 11841 |
| 14 | (school?age* or school age*).ti,ab.       | 17985 |
| 15 | nursery school*.ti,ab.                    | 788   |
| 16 | kindergar*.ti,ab.                         | 13802 |
| 17 | (primary school* or grade school*).ti,ab. | 11182 |
| 18 | secondary school*.ti,ab.                  | 16129 |
| 19 | elementary school*.ti,ab.                 | 20782 |

|    |                                      |        |
|----|--------------------------------------|--------|
| 20 | (high school* or highschool*).ti,ab. | 53463  |
| 21 | child*.ti,ab.                        | 534006 |
| 22 | (kid or kids).ti,ab.                 | 3896   |
| 23 | prepubescen*.ti,ab.                  | 308    |
| 24 | pubescen*.ti,ab.                     | 303    |
| 25 | pubert*.ti,ab.                       | 5875   |
| 26 | adolescen*.ti,ab.                    | 203518 |
| 27 | teenage*.ti,ab.                      | 11697  |
| 28 | boy*.ti,ab.                          | 55389  |
| 29 | girl*.ti,ab.                         | 56498  |
| 30 | (minor or minors).ti,ab.             | 19960  |
| 31 | or/6-30 [CHILD FILTER]               | 799726 |
| 32 | caregivers/                          | 27318  |
| 33 | family/                              | 42970  |
| 34 | mothers/                             | 31105  |
| 35 | mother-child relations/              | 17206  |
| 36 | fathers/                             | 8620   |



|    |                                                                                                                                                    |         |
|----|----------------------------------------------------------------------------------------------------------------------------------------------------|---------|
| 37 | father-child relations/                                                                                                                            | 3745    |
| 38 | exp parents/                                                                                                                                       | 98050   |
| 39 | parent-child relations/                                                                                                                            | 22572   |
| 40 | parenting/                                                                                                                                         | 9355    |
| 41 | (care giver* or caregiver* or carer* or guardian*).ti,ab.                                                                                          | 57462   |
| 42 | (famil* or father* or mother* or parent*).ti,ab.                                                                                                   | 550912  |
| 43 | or/32-42 [CAREGIVER FILTER]                                                                                                                        | 584424  |
| 44 | decision making/                                                                                                                                   | 66685   |
| 45 | evidence-based practice/                                                                                                                           | 17323   |
| 46 | health education/                                                                                                                                  | 12050   |
| 47 | exp Information Literacy/                                                                                                                          | 271     |
| 48 | information services/                                                                                                                              | 687     |
| 49 | Patient Participation/                                                                                                                             | 2067    |
| 50 | Patient Satisfaction/                                                                                                                              | 5365    |
| 51 | quality of life/                                                                                                                                   | 39183   |
| 52 | (adhere* or nonadhere* or attitude* or belie* or complian* or comply or noncomplian* or focus group* or health litera* or inform* or interview* or | 1804003 |

|    |                                                                                                                                                                                                                                                                                                                                                                                                                                                               |         |
|----|---------------------------------------------------------------------------------------------------------------------------------------------------------------------------------------------------------------------------------------------------------------------------------------------------------------------------------------------------------------------------------------------------------------------------------------------------------------|---------|
|    | know* or misconce* or opinion* or participat* or perspective* or prefer* or QOL or quality of life or questionnaire* or satisf*).ti,ab.                                                                                                                                                                                                                                                                                                                       |         |
| 53 | or/44-52 [PATIENT PREFERENCES]                                                                                                                                                                                                                                                                                                                                                                                                                                | 1839786 |
| 54 | (canad* or united states or USA).ti,ab,in,lo,pl,so.                                                                                                                                                                                                                                                                                                                                                                                                           | 355459  |
| 55 | (Alberta* or British Columbia* or Colombie Britannique* or Ile du Prince Edouard* or Labrador* or Manitoba* or New Brunswick* or Newfoundland* or Northwest Territories* or Nouveau Brunswick*).ti,ab,in,lo,pl,so.                                                                                                                                                                                                                                            | 51792   |
| 56 | (Calgar* or Edmonton* or Montreal* or Ottawa* or Toronto* or Vancouver* or Winnipeg*).ti,ab,in,lo,pl,so.                                                                                                                                                                                                                                                                                                                                                      | 151512  |
| 57 | (First Nation* or Metis).ti,ab,in,lo,pl,so.                                                                                                                                                                                                                                                                                                                                                                                                                   | 1706    |
| 58 | (North America* or Northamerica*).ti.                                                                                                                                                                                                                                                                                                                                                                                                                         | 1237    |
| 59 | (Nouvelle Ecosse or Nova Scotia* or Nun?v?t or NWT* or Ontario* or Prince Edward Island* or PEI* or Quebec* or Saskatchewan* or Terre Neuve* or Territoires du Nord Ouest or Yukon*).ti,ab,in,lo,pl,so.                                                                                                                                                                                                                                                       | 39021   |
| 60 | (Alabama* or Alaska* or Arizona* or Arkansas* or California* or Colorad* or Connecticut* or Delawar* or Florid* or Georgia* or Hawaii* or Idaho* or Illinois* or Indiana* or Iowa* or Kansas* or Kentuck* or Louisian* or Maine* or Maryland* or Massachusetts* or Michigan* or Minnesota* or Mississippi* or Missouri* or Montana* or Nebraska* or Nevada* or New Hampshire* or New Jersey* or New Mexic* or New York* or North Carolin* or North Dakota* or | 1342150 |

|    |                                                                                                                                                                                                                                                                |         |
|----|----------------------------------------------------------------------------------------------------------------------------------------------------------------------------------------------------------------------------------------------------------------|---------|
|    | Ohio* or Oklahoma* or Oregon* or Pennsylvania* or Rhode Island* or South<br>Carolin* or South Dakota* or Tennessee* or Texas* or Texan* or Utah* or<br>Vermont* or Virginia* or Washington* or West Virginia* or Wisconsin* or<br>Wyoming*).ti,ab,in,lo,pl,so. |         |
| 61 | or/54-60 [US & CANADA FILTER]                                                                                                                                                                                                                                  | 1600619 |
| 62 | 5 and 31 and 43 and 53 and 61                                                                                                                                                                                                                                  | 505     |
| 63 | limit 62 to ((english or french) and yr="2002 -Current")                                                                                                                                                                                                       | 418     |

14

15 Database: Cochrane Library

16 Search title: Asthma-Parental-Info\_TREKK\_4

17 Date Run: 24/12/2019 06:06:25

18 Comment: Asthma SR for parental info needs for TREKK.

19 ID Search Hits

20 #1 MeSH descriptor: [Asthma] explode all trees and with qualifier(s): [drug therapy - DT,  
21 prevention & control - PC, therapy - TH] 7989

22 #2 (asthma\* and exacerbat\*):ti,ab 3774

23 #3 ((acute or attack\*) near/2 asthma\*):ti,ab 2046

24 #4 (asthma\* near/1 manag\*):ti,ab 887

25 #5 (122-#4) 11971

|    |     |                                                        |        |
|----|-----|--------------------------------------------------------|--------|
| 26 | #6  | [mh ^"adolescent"]                                     | 101825 |
| 27 | #7  | [mh ^"child"]                                          | 1119   |
| 28 | #8  | [mh ^"infant"]                                         | 427    |
| 29 | #9  | [mh ^"minor"]                                          | 8      |
| 30 | #10 | [mh ^"pediatrics"]                                     | 609    |
| 31 | #11 | (p?ediatric*):ti,ab                                    | 30471  |
| 32 | #12 | (newborn*):ti,ab                                       | 8954   |
| 33 | #13 | (baby* or babies*):ti,ab                               | 7812   |
| 34 | #14 | (infant*):ti,ab                                        | 37114  |
| 35 | #15 | (toddler*):ti,ab                                       | 1531   |
| 36 | #16 | (preschooler* or pre-schooler* or pre schooler*):ti,ab | 914    |
| 37 | #17 | (schoolchild* or school-child*):ti,ab                  | 3718   |
| 38 | #18 | (school age* or school-age* or school age*):ti,ab      | 10003  |
| 39 | #19 | (nursery school*):ti,ab                                | 114    |
| 40 | #20 | (kindergar*):ti,ab                                     | 646    |
| 41 | #21 | (primary school* or grade school*):ti,ab               | 9211   |
| 42 | #22 | (secondary school*):ti,ab                              | 4819   |
| 43 | #23 | (elementary school*):ti,ab                             | 1557   |

44 #24 (high school\*):ti,ab 6721

45 #25 (highschool\* or high-school\*):ti,ab 3025

46 #26 (child\*):ti,ab 118599

47 #27 (kid or kids):ti,ab 970

48 #28 (prepubescen\*):ti,ab 93

49 #29 (pubescen\*):ti,ab 53

50 #30 (adolescen\*):ti,ab 24415

51 #31 (teenage\*):ti,ab 1215

52 #32 (boy\*):ti,ab 6659

53 #33 (girl\*):ti,ab 6917

54 #34 (minor or minors):ti,ab 15870

55 #35 (2-#34)270766

56 #36 [mh ^"caregivers"] 1979

57 #37 [mh ^"family"] 1406

58 #38 [mh ^"mothers"] 1669

59 #39 [mh ^"mother-child relations"] 759

60 #40 [mh ^"fathers"] 166

61 #41 [mh ^"father-child relations"] 63

62 #42 [mh "parents"]4642

63 #43 [mh ^"parent-child relations"] 1072

64 #44 [mh ^"parenting"] 1174

65 #45 [mh ^"legal guardians"] 19

66 #46 (care giver\* or caregiver or carer\* or guardian\*):ti,ab 12090

67 #47 (families\* or family\* or father\* or mother\* or parent\*):ti,ab 73855

68 #48 (13-#47) 81001

69 #49 [mh ^"attitude to health"] 2878

70 #50 MeSH descriptor: [Caregivers] explode all trees and with qualifier(s): [education - ED,  
71 psychology - PX] 1387

72 #51 [mh "consumer health information"] 470

73 #52 [mh ^"decision making"] 2158

74 #53 [mh ^"evidence-based practice"] 273

75 #54 [mh ^"focus groups"] 578

76 #55 [mh ^"health education"] 3756

77 #56 [mh ^"health knowledge, attitudes, practice"] 5745

78 #57 [mh "information literacy"] 339

79 #58 [mh ^"information seeking behavior"] 44

80 #59 [mh ^"information services"] 83

81 #60 [mh "patient acceptance of health care"] 16678

82 #61 [mh ^"patient compliance"] 9489

83 #62 [mh ^"patient education as topic"] 8451

84 #63 [mh ^"patient participation"] 1266

85 #64 [mh ^"patient satisfaction"] 11076

86 #65 [mh ^"personal satisfaction"] 830

87 #66 [mh ^"quality of life"]22466

88 #67 [mh ^"retention (psychology)"] 661

89 #68 [mh ^"surveys and questionnaires"] 24710

90 #69 [mh ^"life change events"] 456

91 #70 (adhere\* or nonadhere\*):ti,ab,kw 31563

92 #71 attitude\*:ti,ab,kw 23057

93 #72 belie\*:ti,ab,kw16333

94 #73 (complan\* or comply or noncomplan\*):ti,ab,kw 50082

95 #74 focus group:ti,ab,kw 13325

96 #75 health litera\*:ti,ab,kw 12638

97 #76 inform\*:ab 135379

98 #77 interview\*:ti,ab,kw 32880

99 #78 know\*:ab 89752

100 #79 misconce\*:ti,ab,kw 401

101 #80 opinion\*:ti,ab,kw 6605

102 #81 participat\*:ti,ab,kw 100558

103 #82 perspective\*:ti,ab,kw 11455

104 #83 prefer\*:ti,ab,kw 32225

105 #84 QoL:ti,ab,kw 17994

106 #85 quality of life:ti,ab,kw 104628

107 #86 questionnaire:ti,ab,kw 90046

108 #87 satisf\*:ti,ab,kw 58707

109 #88 (73-#87) 506229

110 #89 #5 and #35 and #48 and #88 650

111 #90 [mh ^"North America"] 324

112 #91 [mh "United States"] 18782

113 #92 [mh "Canada"] 3423

114 #93 (Canada or United States or USA):ti,ab,kw 48041

115 #94 (Alberta\* or British Columbia\* or Colombie Britannique\* or Ile du Prince Edouard\* or

116 Labrador\* or Manitoba\* or New Brunswick\* or Newfoundland\* or Northwest Territories\* or

117 Nouveau Brunswick\*):ti,ab,kw 1551



118 #95 (Calgar\* or Edmonton\* or Montreal\* or Ottawa\* or Toronto\* or Vancouver\* or  
119 Winnipeg\*):ti,ab,kw 5744

120 #96 (First Nation\* or Metis):ti,ab,kw 8151

121 #97 (North America\* or Northamerica\*):ti 490

122 #98 (Nouvelle Ecosse or Nova Scotia\* or Nun?v?t or NWT\* or Ontario\* or Prince Edward  
123 Island\* or PEI\* or Quebec\* or Saskatchewan\* or Terre Neuve\* or Territoires du Nord Ouest or  
124 Yukon\*):ti,ab,kw 7071

125 #99 (Alabama\* or Alaska\* or Arizona\* or Arkansas\* or California\* or Colorad\* or  
126 Connecticut\* or Delawar\* or Florid\* or Georgia\* or Hawaii\* or Idaho\* or Illinois\* or Indiana\*  
127 or Iowa\* or Kansas\* or Kentuck\* or Louisian\* or Maine\* or Maryland\* or Massachusetts\* or  
128 Michigan\* or Minnesota\* or Mississippi\* or Missouri\* or Montana\* or Nebraska\* or Nevada\*  
129 or New Hampshire\* or New Jersey\* or New Mexic\* or New York\* or North Carolin\* or North  
130 Dakota\* or Ohio\* or Oklahoma\* or Oregon\* or Pennsylvania\* or Rhode Island\* or South  
131 Carolin\* or South Dakota\* or Tennessee\* or Texas\* or Texan\* or Utah\* or Vermont\* or  
132 Virginia\* or Washington\* or West Virginia\* or Wisconsin\* or Wyoming\*):ti,ab,kw 39613

133 #100 (77-#99) 97231

134 #101 #89 and #100 with Publication Year from 2002 to 2019, with Cochrane Library  
135 publication date Between Jan 2002 and Dec 2019, in Trials 110
